# Supplementary material for: Association of TGF-β1 and IL-10 Gene Polymorphisms with Osteoporosis in a Study of Taiwanese Osteoporotic Patients
Source: MDPI journal article supplement (doi:10.3390/genes12060930), 2021-06-18
Supplement: s1 [file s1]

**Supplementary Table S1.** PCR-RFLP results obtained from each patient

| Patient No. | TGF- $\beta$ 1 SNP |      |      |
|-------------|--------------------|------|------|
|             | -509               | +869 | +29  |
| 1           | C/C                | C/C  | T/T  |
| 2           | C/T                | C/T  | C/T  |
| 3           | T/T                | T/T  | C/C  |
| 4           | C/C                | C/C  | T/T  |
| 5           | C/T                | C/T  | C/T  |
| 6           | C/T                | C/T  | C/T  |
| 7           | C/C                | C/C  | T/T  |
| 8           | C/T                | C/T  | C/T  |
| 9           | C/T                | C/T  | C/T  |
| 10          | C/T                | C/T  | C/T  |
| 11          | C/T                | C/T  | C/T  |
| 13          | T/T                | T/T  | C/C  |
| 14          | C/T                | C/T  | C/T  |
| 15          | T/T                | T/T  | C/C/ |
| 16          | C/T                | C/T  | C/T  |
| 17          | T/T                | T/T  | C/C  |
| 18          | C/T                | C/T  | C/T  |
| 19          | C/C                | C/C  | T/T  |
| 20          | C/C                | C/C  | T/T  |
| 21          | C/T                | C/T  | C/T  |
| 22          | T/T                | T/T  | C/C  |
| 23          | T/T                | T/T  | C/C  |
| 24          | C/T                | C/T  | C/T  |
| 25          | C/C                | C/C  | T/T  |
| 26          | C/T                | C/T  | C/T  |
| 27          | C/T                | C/T  | C/T  |
| 28          | C/T                | C/T  | C/T  |
| 29          | C/T                | C/T  | C/T  |
| 30          | C/T                | C/T  | C/T  |
| 31          | T/T                | T/T  | C/C  |
| 32          | T/T                | T/T  | C/C  |
| 33          | C/T                | C/T  | T/T  |
| 34          | T/T                | T/T  | C/C  |
| 35          | T/T                | T/T  | C/C  |
| 36          | C/C                | C/C  | T/T  |
| 37          | T/T                | T/T  | C/C  |
| 38          | C/C                | C/C  | T/T  |
| 39          | C/T                | C/T  | C/T  |
| 40          | C/T                | C/T  | C/T  |
| 41          | C/T                | C/T  | C/T  |
| 42          | C/T                | C/T  | C/T  |

**Supplementary Table 2.** Bone mineral density (BMD) of patients with osteoporosis and control subjects determined by a dual-energy X-ray absorptiometry (DXA)

| Parameter                    | Patients with<br>Osteoporosis/Osteopenia<br>with Fractures | Controls    | <i>p</i> -<br>Value |
|------------------------------|------------------------------------------------------------|-------------|---------------------|
| DXA BMD (g/cm <sup>3</sup> ) |                                                            |             |                     |
| Spine                        | 0.84 ± 0.15                                                | 1.05 ± 0.11 | < 0.001             |
| Hip Neck                     | 0.60 ± 0.11                                                | 0.79 ± 0.10 | < 0.001             |
| Total Hip                    | 0.71 ± 0.14                                                | 0.92 ± 0.10 | < 0.001             |

**Supplementary Table 3.** The frequency and location of fractures in the subjects of this cohort study

| Parameter             | Patients with<br>Osteoporosis/Osteopenia<br>with Fractures | Controls |
|-----------------------|------------------------------------------------------------|----------|
| Location of fractures |                                                            |          |
| Spine                 | 32/88 (36.36%)                                             | 0/129    |
| Hip                   | 18/88 (20.45%)                                             | 0/129    |
| Wrist shoulder        | 29/88 (32.95%)                                             | 0/129    |
| Thigh leg             | 12/88 (13.64%)                                             | 0/129    |
